# Supplementary material for: Glucocorticoid-Responsive Transcription Factor Krüppel-Like Factor 9 Regulates fkbp5 and Metabolism
Source: Front Cell Dev Biol. 2021 Oct 6;9:727037. doi: 10.3389/fcell.2021.727037 (PMC8526736; doi:10.3389/fcell.2021.727037)
Supplement: Supplementary file 4 [file Table_2.XLSX]

## Sheet: Sheet1
GC Responsive (Gans, Sci. Rep., 2020)	Has E-Box	Has KLF motif	Has GRE		GC responsive not found by HOMER
arl5c	arl5c	btg2	arl5c		adgrf8
btg1	btg1	c4b	btg1		cyldb
btg2	btg2	ca15c	cebpd		cyp2k6
c4b	c4b	calcoco1b	chac1		ier2a
ca15c	ca15c	cbx7a	cyp2n13		ier2b
calcoco1b	calcoco1b	cd40	diabloa		itgb2
cbx7a	cbx7a	cdab	dusp1		itpkcb
cd40	cd40	cebpd	entpd8		klhl38b
cdab	cdab	cfbl	fbxo32		MFAP4_(1_of_many)
cebpd	cebpd	chac1	fkbp5		pdk2a
cfbl	chac1	cmklr1	fosab		psme4a
chac1	cmklr1	cpne3	g6pca.2		ptprc
cmklr1	cpne3	cyp2k6	ier2b		rbp7a
cpne3	cx28.9	cyp2n13	irf1b		slc2a6
cx28.9	cybb	ddit4	irg1l		slc6a19a.1
cybb	cyp2k6	diabloa	klf9		tppp
cyp2k6	cyp2n13	dusp1	lpin1		ulk2
cyp2n13	diabloa	egr1	lygl1		urgcp
ddit4	dusp1	egr4	mpeg1.2		AL929237.1
diabloa	egr1	entpd8	mych		AL954191.1
dusp1	egr4	epas1b	nfkbiab		AL954655.1
egr1	entpd8	fbp1b	noxo1a		AL954655.2
egr4	epas1b	fbxo32	npas4a		CR318588.3
entpd8	fbp1b	fkbp5	nr1d1		CR385054.1
epas1b	fbxo32	fn1b	nr1d2a		CR753876.1
fbp1b	fkbp5	fosab	plekhs1		CR788316.4
fbxo32	fosab	gadd45ba	rel		CR855311.1
fkbp5	g6pca.2	gbp1	rhcga		CR926130.2
fn1b	gadd45ba	ier2a	scpp1		CU914622.2
fosab	gbp1	ier2b	scpp9		FO704661.1
g6pca.2	grna	irf1b	si:ch211-240l19.5		FO904966.1
gadd45ba	ier2a	junba	slc25a25a		LO018605.1
gbp1	ier2b	junbb	slc25a5		sb:cb1058
grna	irf1b	klf9	slc3a2b		si:ch211-133n4.9
ier2a	irg1l	lcp1	socs1a		si:ch211-147m6.1
ier2b	junba	LOC553228	sult1st2		si:ch211-153b23.3
irf1b	junbb	lpin1	tob1a		si:ch211-157j23.2
irg1l	klf9	mmp9	tsc22d3		si:ch211-182p11.1
junba	lcp1	mpeg1.2	txnipa		si:ch211-194m7.3
junbb	LOC553228	mych	upp2		si:ch211-201o1.1
klf9	lpin1	nfkbiaa	zgc:113625		si:ch211-207n23.2
lcp1	lygl1	nfkbiab	zgc:122979		si:ch211-214p16.3
LOC553228	mpeg1.2	noxo1a	zgc:153932		si:ch211-219a15.4
lpin1	mych	npas4a	zgc:154142		si:ch211-226h7.3
lygl1	nfkbiaa	nr1d1			si:ch211-226h7.5
mmp9	nfkbiab	nr1d2a			si:ch211-226h7.6
mpeg1.2	noxo1a	oxgr1a.1			si:ch211-226h7.8
mych	npas4a	pck1			si:ch211-39f2.3
nfkbiaa	nr1d1	pdk2b			si:ch73-181m17.1
nfkbiab	nr1d2a	pfkfb3			si:ch73-338o16.4
noxo1a	oxgr1a.1	plekhs1			si:ch73-63e15.2
npas4a	pck1	pnpla3			si:dkey-201c13.2
nr1d1	pdk2b	rbp7a			si:dkey-201i2.4
nr1d2a	pfkfb3	rel			si:dkey-202l22.6
oxgr1a.1	plekhs1	rgs2			si:dkey-239b22.1
pck1	pnpla3	rhcga			si:dkey-247k7.2
pdk2b	rbp7a	scpp1			si:dkey-8k3.2
pfkfb3	rel	scpp9			si:dkeyp-1h4.6
plekhs1	rgs2	si:ch211-240l19.5			zgc:152945
pnpla3	rhcga	slc14a2
rbp7a	scpp1	slc15a1b
rel	scpp9	slc25a25a
rgs2	si:ch211-240l19.5	slc25a5
rhcga	slc14a2	slc34a2a
scpp1	slc15a1b	slc3a2b
scpp9	slc25a25a	slc5a1
si:ch211-240l19.5	slc25a5	slc6a19a.1
slc14a2	slc34a2a	socs1a
slc15a1b	slc3a2b	socs3a
slc25a25a	slc5a1	stat4
slc25a5	slc6a19a.1	sult1st2
slc34a2a	socs1a	tdo2b
slc3a2b	socs3a	tob1a
slc5a1	stat4	tob1b
slc6a19a.1	sult1st2	tsc22d3
socs1a	sult5a1	txnipa
socs3a	tdo2b	ucp1
stat4	tob1a	ucp3
sult1st2	tob1b	upp2
sult5a1	tsc22d3	zgc:100868
tdo2b	txnipa	zgc:113625
tob1a	ucp1	zgc:122979
tob1b	ucp3	zgc:153932
tsc22d3	upp2	zgc:154142
txnipa	zgc:100868	zgc:172065
ucp1	zgc:113625	zgc:172131
ucp3	zgc:122979	zgc:173915
upp2	zgc:153932
zgc:100868	zgc:154142
zgc:113625	zgc:172065
zgc:122979	zgc:172131
zgc:153932	zgc:173915
zgc:154142
zgc:172065
zgc:172131
zgc:173915
